# Supplementary material for: Perception Of Undergraduate Medical Students Regarding “Reel-Making” As An Innovative Learning Method In Ophthalmology: A cross-sectional study
Source: Research Square preprint supplement (doi:10.21203/rs.3.rs-6006194/v1), 2025-04-18
Supplement: Supplementary file 1 [file 618a6d5bd48376c4cb47f913.xlsx]

## Sheet: Form responses 1
Roll no.	Age	Gender	The reels making activity evoked my interest in the subject/topic	The interaction with my peers during reels making was fascinating	Making the reels perked my interest in the topic	I actively participated in the reels making activity	I liked the idea of having this new teaching-learning method	I will recommend this learning experience to my peers or juniors	How helpful were the postgraduates and teachers in this activity?	What are the challenges you faced during this activity? Explain in 3 sentences	What did you like about the activity? Explain in 2-3 statements	Do you feel this type of innovative teaching- learning method should be advocated in all subjects? Mark your opinion on a scale from 1 to 10, 1 being the least, and 10 being the highest.
17	21	Female	Strongly agree	Agree	Strongly agree	Strongly agree	Strongly agree	Strongly agree	7	Less time to do so, if it was informed prior we could have read up more	I learnt info in a short time through visuals which helps coz I'm a visual learner	8
22	22	Female	Strongly agree	Strongly agree	Strongly agree	Strongly agree	Strongly agree	Strongly agree	1	It was easy	It was fun	10
3	21	Female	Strongly agree	Strongly agree	Strongly agree	Strongly agree	Strongly agree	Strongly agree	9	-	Interaction among classmates and learning about the particular topic in an interesting way	9
04	22	Female	Agree	Strongly agree	Agree	Strongly Disagree	Strongly agree	Strongly agree	8			8
18	21	Female	Agree	Strongly agree	Agree	Strongly agree	Agree	Agree	8	-	the interest towards the subject increased and it was a fun way of learning	9
8	22	Female	Agree	Strongly agree	Agree	Agree	Agree	Agree	7	Language barrier	Everyone's active participation	8
16	21	Female	Agree	Agree	Agree	Agree	Agree	Agree	8	E	Had fun	9
13	22	Female	Strongly agree	Strongly agree	Strongly agree	Strongly Disagree	Strongly agree	Strongly agree	10	Everybody was very cooperative it was very enjoyable experience.	It was fun and educational searching for the symptoms of the disease. It was very fun and intuitive to see your batchemates ideas 💡.	10
28	22	Female	Strongly agree	Strongly agree	Agree	Strongly agree	Strongly agree	Strongly agree	5	To condense the content into short reels were difficult. To get consent from patient party to be videographed was also difficult.	It was a fun experience. Could interact more, put in more ideas, build our team spirit and changed the way of thinking about diseases only in the text book format to fun reels format.	8
21M4059	22	Female	Agree	Agree	Agree	Neutral	Neutral	Agree	7			5
20	21	Male	Disagree	Agree	Disagree	Agree	Agree	Disagree	5			4
159	22	Male	Neutral	Neutral	Neutral	Neutral	Neutral	Neutral				6
6	21	Female	Agree	Agree	Agree	Agree	Agree	Agree	9	Language and communication with patient	Everything	6
14	21	Female	Strongly agree		Strongly agree	Strongly Disagree	Strongly agree	Strongly agree	6	-short duration of time - limited access to internet	-we were able to engage our creative side which is usually suppressed in our course	9
31	22	Female	Agree	Strongly agree	Agree	Neutral	Agree	Agree	5	How to deliver the message we want to deliver. Time management. (Lengthy of the reel) Patient co operation	Great team activity Informative Fun activity	8
26	21	Female	Agree	Agree	Agree	Agree	Agree	Agree	6			8
12		Female	Agree	Agree	Agree	Agree	Agree	Agree	9	to concise the topic and present in short form of reel	Exchange of ideas between peers and teamwork	8
21	21	Male	Strongly agree	Strongly agree	Strongly agree	Strongly Disagree	Strongly agree	Strongly agree	9	novelty of the idea made us hesitant at the beginning but we got more comfortable as time progressed	it's fun, fairly easy to do without being too time consuming, makes it easier to remember certain concepts related to pathologies	10
21M4056	21	Female	Agree	Strongly agree	Strongly agree	Agree	Strongly agree	Agree	8	Nothing	Fun filled interactions	10
23	20	Female	Strongly agree	Strongly agree	Strongly agree	Strongly Disagree	Strongly agree	Agree	9			8
30	22	Female	Agree	Agree	Strongly agree	Neutral	Agree	Strongly agree	8	Language barriers	It was fun while doing the activity and we learnt what are the causes of cataract and types of cataract.	9
25	21	Female	Strongly agree	Strongly agree	Strongly agree	Strongly Disagree	Strongly agree	Strongly agree	10	Nothing much. We all shared our ideas and completed it pretty quickly	It was fun and away from our usual room confined learning	5
19	22	Male	Neutral	Agree	Agree	Agree	Agree	Agree	10	Nothing	Interactive session with batchmates	10
9		Female	Agree	Agree	Agree	Neutral	Agree	Neutral	7			8
16	21	Male	Agree	Strongly agree	Strongly agree	Strongly agree	Strongly disagree	Strongly agree	9			9
27	22	Female	Neutral	Agree	Neutral	Agree	Neutral	Strongly disagree	6			5
22PG184	27	Female	Strongly agree	Strongly agree	Strongly agree	Strongly agree	Strongly agree	Strongly agree	10	Choosing Locations	It was exciting All the group members got actively involved Instagram usage in a healthy way	10
68	28	Female	Neutral	Agree	Agree	Agree	Agree	Neutral	6	Attention span was less, lot of prep time	It was fun and helpful	6
3	23	Female	Agree	Strongly agree	Strongly agree	Agree	Strongly agree	Strongly agree	9	team work	makes learning fun	9
23pg053	24	Female	Agree	Agree	Agree	Agree	Agree	Agree	10			10
Deepika	23	Female	Strongly agree	Strongly agree	Strongly agree	Strongly agree	Strongly agree	Strongly agree	10			10
86	21	Male	Agree	Strongly agree	Agree	Agree	Agree	Strongly agree	8		It was a fun way to incorporate academics and fun.it expands our creative perspectives	9
79	21	Female	Strongly agree	Strongly agree	Strongly agree	Strongly agree	Strongly agree	Strongly agree	10			10
66	20	Female	Agree	Agree	Agree	Strongly agree	Agree	Agree	9	We had to balance shooting the video along with our regular classes in a short amount of time. We also had to figure out how to make the reel interactive and engaging. We had to learn how to edit and make the finished product.	I liked that we got an outlet for our creativity and it was for a good cause that would hopefully benefit society. I also enjoyed working with my teammates to come up with the concept and idea for the reel.	8
72	22	Female	Agree	Agree	Neutral	Agree	Agree	Agree	5	A bad coordination among my peers	I got to know more about the topic	5
84	23	Male	Agree	Agree	Agree	Agree	Neutral	Neutral	7	Camera exposure.	My mother liked it.	5
87	20	Female	Neutral	Neutral	Neutral	Agree	Disagree	Disagree	3	Not everyone contributed to making of the reel, extra work, not a social media person, difficulty to make it interesting	It can bring change in the lives of the people by raising awareness through this innovative approach. Made it group work rather than individual work helps in developing skills	1
74	21	Male	Agree	Strongly agree	Agree	Strongly agree	Neutral	Disagree	1	Lack of space to shoot	Team work	7
64	20	Female	Neutral	Agree	Neutral	Agree	Neutral	Agree	3	It was difficult because I didn’t have any editing skills. It was hard to make it look fun and engaging. The time constraint of two days made it stressful.	It was definitely a new method of applying the information we had learned. It was nice closely working with the my group.	8
82	20	Female	Agree	Agree	Agree	Agree	Agree	Agree	8	Idea differences	Coordination	5
69	20	Female	Agree	Agree	Strongly agree	Strongly Disagree	Agree	Agree	4	lack in understanding what information shd be given to the common man	that it helped us summarize and explain to ppl the importance of the topic and raise awareness for the same	10
81	23	Female	Agree	Neutral	Agree	Strongly agree	Agree	Agree	5	Probably,the group formation, and idea of setting up new and unique way to show up the topic of interest	It was engaging,and something we would obviously have fun doing with.	8
136	20	Male	Agree	Agree	Neutral	Neutral	Agree	Agree	7	.	.	10
70	21	Female	Agree	Agree	Agree	Strongly agree	Agree	Agree	5	Common interest Time Communication	Combined effort Interesting	9
88	22	Female	Agree	Neutral	Agree	Strongly agree	Strongly agree	Agree	5			5
73	21	Female	Agree	Strongly agree	Agree	Agree	Strongly agree	Neutral	10			8
83	20	Female	Agree	Strongly agree	Neutral	Strongly agree	Neutral	Neutral	1	Time limit	Brought us closer to our team Made us read about the topic	5
91	21	Female	Disagree	Agree	Disagree	Strongly agree	Disagree	Disagree	9	It was pretty short notice Everybody did not contribute to the activity, hence leaving most of the work to a few people in each group It was hard to find time for this activity amongst all of the other subjects we need to handle	Shooting the reel was fun. We learnt a few creative ways to film a reel	2
89	21	Male	Agree	Agree	Agree	Agree	Agree	Agree	5			6
79	21	Female	Agree	Agree	Agree	Strongly agree	Neutral	Agree	9			7
63	21	Male	Neutral	Agree	Neutral	Strongly agree	Neutral	Strongly agree	8			5
71( 22M3681)	21	Female	Agree	Strongly agree	Agree	Strongly agree	Agree	Agree	5	Didn’t face challenges per se We had a clear vision about what we wanted to do and had a plan on how to achieve it	It was fun to come up with something innovative and creative Extremely wholesome to work as a team	8
