# Supplementary material for: Perception Of Undergraduate Medical Students Regarding “Reel-Making” As An Innovative Learning Method In Ophthalmology: A cross-sectional study
Source: Research Square preprint supplement (doi:10.21203/rs.3.rs-6006194/v1), 2025-04-18
Supplement: Supplementary file 1 [file 02590dac9b5c2d1bf4d66506.pdf]

## Annexure- 1: Questionnaire

Age: \_\_\_\_\_ years

Gender

Male ☐ Female ☐ Others ☐

1. The reels making activity evoked my interest in the subject/topic

Strongly disagree ☐

Disagree ☐

Neutral ☐

Agree ☐

Strongly agree ☐

2. The interaction with my peers during reels making was fascinating

Strongly disagree ☐

Disagree ☐

Neutral ☐

Agree ☐

Strongly agree ☐

3. Making the reels perked my interest in the topic

Strongly disagree ☐

Disagree ☐

Neutral ☐

Agree ☐

Strongly agree ☐

4. I actively participated in the reels making activity

Strongly disagree ☐

Disagree ☐

Neutral ☐

Agree ☐

Strongly agree ☐

5. I liked the idea of having this new teaching-learning method

Strongly disagree ☐

Disagree ☐

Neutral ☐

Agree ☐

Strongly agree ☐

6. I will recommend this learning experience to my peers or juniors

Strongly disagree ☐

Disagree ☐

Neutral ☐

Agree ☐

Strongly agree ☐

7. Postgraduates and teachers were helpful in this task

Strongly disagree ☐

Disagree ☐

Neutral ☐

Agree ☐

Strongly agree ☐

8. What did you like about the activity? Explain in 2-3 statements

---

---

---

9. What are the challenges you faced during this activity? Explain in 3 sentences

---

---

---

10. Do you feel this type of innovative teaching-learning method should be advocated in all subjects? Mark your opinion on a scale from 1 to 10, 1 being the least, and 10 being the highest.

|   |                          |   |                          |   |                          |   |                          |    |                          |
|---|--------------------------|---|--------------------------|---|--------------------------|---|--------------------------|----|--------------------------|
| 1 | <input type="checkbox"/> | 2 | <input type="checkbox"/> | 3 | <input type="checkbox"/> | 4 | <input type="checkbox"/> | 5  | <input type="checkbox"/> |
| 6 | <input type="checkbox"/> | 7 | <input type="checkbox"/> | 8 | <input type="checkbox"/> | 9 | <input type="checkbox"/> | 10 | <input type="checkbox"/> |
