# Supplementary material for: Perception Of Undergraduate Medical Students Regarding “Reel-Making” As An Innovative Learning Method In Ophthalmology: A cross-sectional study
Source: Research Square preprint supplement (doi:10.21203/rs.3.rs-6006194/v1), 2025-04-18
Supplement: Supplementary file 2 [file 8e577fa1779bfd74899b8b91.pdf]

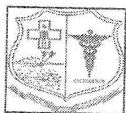

# FATHER MULLER INSTITUTIONAL ETHICS COMMITTEE (FMIEC)

Father Muller Research Centre

Father Muller Road, Kankanady, Mangalore – 575 002. Karnataka, India

DCGI Re-Registration No. ECR/ 540/ Inst/ KA/ 2014 / RR -20, OHRP: IORG #: IORG0008398, OMB No. 0990-0279

Tel: 0824-2238327

E-mail: fmiethicscommitte@fathermuller.in

Ref No: FMIEC/CCM /777/2024

Date: 13.09.2024

**Protocol Title:** "Perception of undergraduate medical students Regarding "Reel-Making" as an innovative learning method in ophthalmology"

**Protocol No:** 819/2024

**principal Investigator :** Dr. Sunayana Bhat **Co Investigator :** Dr. Madhurima A Nayak, Dr. Akshata Charlotte

**Name & Address of Institution:**

D Dept of Ophthalmology Father Muller Medical College, Father Muller Road Kankanady, Mangalore-575002

**Date of Review & Approval :** 13.09.2024

**Decision of the Ethics Committee:**

> **Approved** ✓ / Revision and Resubmission / Rejected

**Suggestions:** Nil

**Approval Validation :** One Year from the date of Initiation of Study

## Members Present

| Sl. No. | Name of Member                      | Role/Designation in Ethics Committee |
|---------|-------------------------------------|--------------------------------------|
| 1.      | Dr. Jayaprakash Shetty K            | Chairperson                          |
| 2       | Dr. Anahita R Shenoy                | Member Secretary                     |
| 3       | Rev. Dr. Praveen Leo Lasrdo         | Member- Theologian                   |
| 4       | Dr. Jaidev M Devdas                 | Member – Clinician & Joint Secretary |
| 5       | Dr. Pooja M                         | Member-Basic Medical Scientist       |
| 6       | Dr. Leo Francis Tauro               | Member - Clinician                   |
| 7       | Dr. Prasanna Mithra P               | Member - Clinician                   |
| 8       | Prof .Vishwa G.M Bhat               | Member-Social Scientist              |
| 9       | Mr. Sushanth Clement Alwyn Saldanha | Member – Legal Expert                |
| 10      | Mr. Peter Antony Pinto              | Member – Lay Person                  |
| 11      | Dr. Devina E Rodrigues              | Member- Nursing                      |
| 12      | Dr. Skandhan S Kumar                | Member – Homeopathy                  |

## Please note:

- > Do CTRI registration.
- > Inform Ethics Committee immediately in case of any adverse events and serious adverse events.
- > Inform Ethics Committee in case of any change of study procedure, site and investigator.
- > This permission is only for a period mentioned above. Annual report to be submitted to Ethics Committee, and renewal of approval has to be requested.
- > Members of Ethics committee have right to monitor the study with prior intimation

*Anahita*

13/9/24

Dr. Anahita R Shenoy

Member Secretary

Father Muller Institutional Ethics Committee

Member Secretary

Father Muller Institutional Ethics Committee  
Kankanady, Mangaluru
